# Supplementary material for: Amending the algorithm of aerosol-radiation interaction in WRF-Chem (v4.4)
Source: Copernicus journal article supplement (doi:10.5194/gmd-2024-69), 2024-06-03
Supplement: Supplementary file 1 [file gmd-2024-69-supplement.pdf]

1  
2  
3  
4  
5  
6  
7  
8  
9  
10  
11  
12  
13  
14  
15  
16  
17  
18  
19  
20  
21  
22  
23  
24

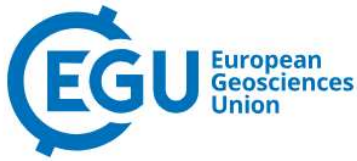

*Geoscientific Model Development*

Supporting Information for

**Amending the algorithm of aerosol-radiation interaction in WRF-Chem  
(v4.4)**

<sup>1</sup>Jiawang Feng, <sup>1,2,3</sup>Chun Zhao\*, <sup>1</sup>Qiuyan Du, <sup>1</sup>Zining Yang, <sup>1</sup>Chen Jin

<sup>1</sup>Deep Space Exploration Laboratory/School of Earth and Space Sciences, University of Science and Technology of China, Hefei, China

<sup>2</sup>Laoshan Laboratory, Qingdao, China

<sup>3</sup>CAS Center for Excellence in Comparative Planetology, University of Science and Technology of China, Hefei, China

The manuscript for submission to *Geoscientific Model Development*

\*Corresponding author: Chun Zhao (chunzhao@ustc.edu.cn)

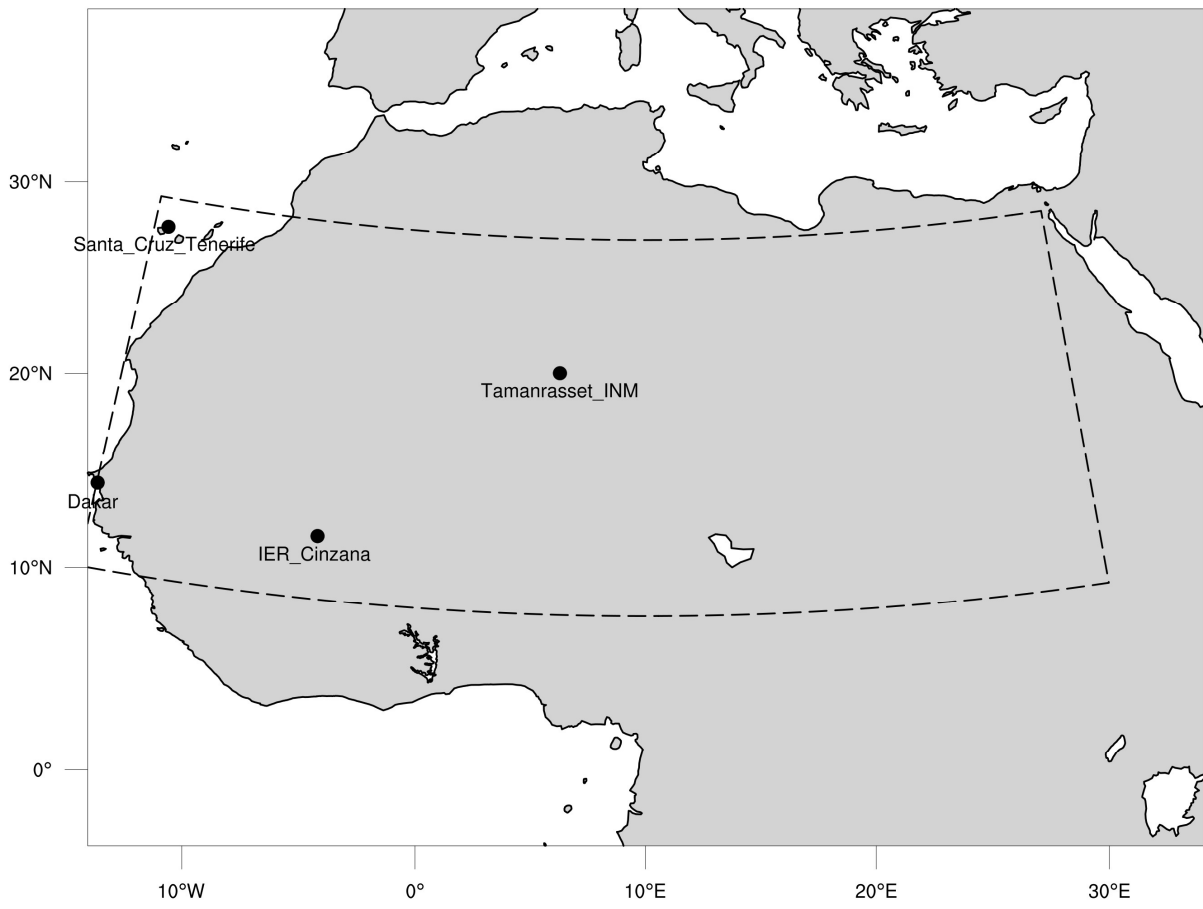

26

27 **Figure S1.** Locations of selected AERONET stations over dust-dominant areas in Sahara.

28

29  
30  
31  
32  
33

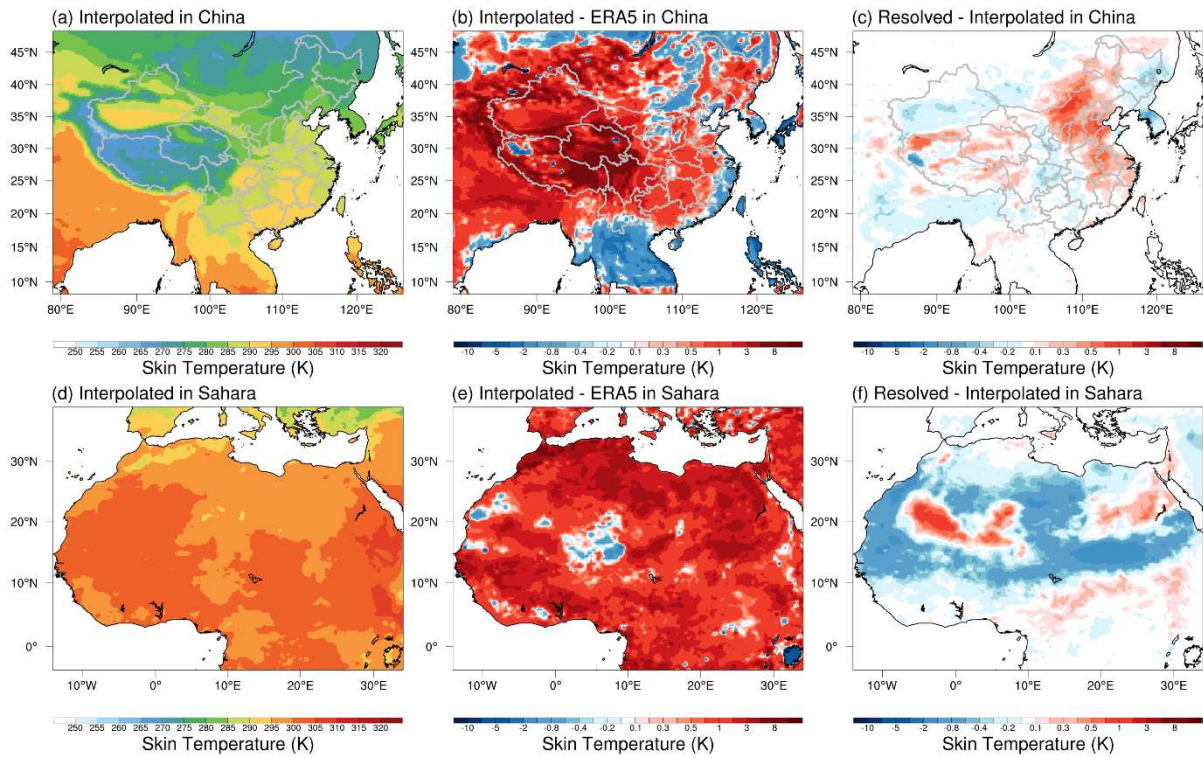

34  
35  
36  
37  
38  
39

**Figure S2. (a,d)** Spatial distribution of skin temperature in China and Sahara, respectively; **(b,e)** The difference in skin temperature between “Interpolated” method and ERA5 results in China and Sahara, respectively. **(c,f)** The difference in skin temperature between “Resolved” and “Interpolated” method in China and Sahara, respectively.

40  
41  
42  
43  
44  
45

### Wind Field at 850hPa (m/s)

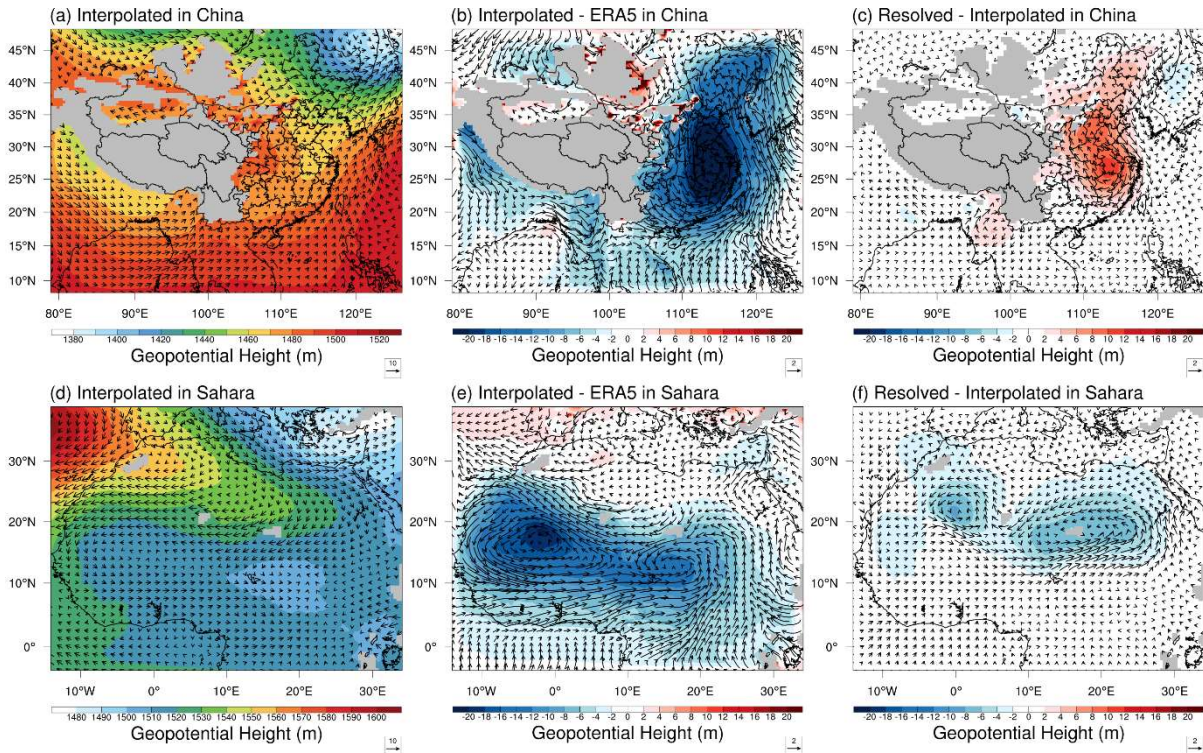

46  
47  
48  
49  
50  
51

**Figure S3.** (a,d) Spatial distribution of geopotential height and wind field in China and Sahara, respectively; (b,e) The difference between “Interpolated” method and ERA5 results in China and Sahara, respectively. (c,f) The difference between “Resolved” and “Interpolated” method in China and Sahara, respectively.
